# Supplementary material for: Promoting Nutrition and Food Sustainability Knowledge in Apprentice Chefs: An Intervention Study at The School of Italian Culinary Arts—ALMA
Source: MDPI journal article supplement (doi:10.3390/nu16040537), 2024-02-15
Supplement: s1 [file s1]

## Supplementary Material S2

**Table S5** Results of satisfaction questionnaire.

| Information                                                                                                               | Replies<br>(n=3599) |
|---------------------------------------------------------------------------------------------------------------------------|---------------------|
| <i>Gender</i>                                                                                                             |                     |
| Females                                                                                                                   | 1528 (42)           |
| Males                                                                                                                     | 2071 (58)           |
| <i>User</i>                                                                                                               |                     |
| Student                                                                                                                   | 2602 (73)           |
| Teacher                                                                                                                   | 947 (26)            |
| Guess                                                                                                                     | 50 (1)              |
| <i>Age group</i>                                                                                                          |                     |
| 18-29                                                                                                                     | 2681 (74)           |
| 30-40                                                                                                                     | 611 (17)            |
| 40-50                                                                                                                     | 282 (8)             |
| > 50                                                                                                                      | 25 (1)              |
| <i>Selected menu</i>                                                                                                      |                     |
| Meat                                                                                                                      | 1327 (37)           |
| Fish                                                                                                                      | 1190 (33)           |
| Vegetarian (or vegan)                                                                                                     | 1082 (30)           |
| <i>Would you have chosen a different menu?</i>                                                                            |                     |
| Yes                                                                                                                       | 703 (20)            |
| No                                                                                                                        | 2896 (80)           |
| <i>Did you finish the entire meal?</i>                                                                                    |                     |
| Yes                                                                                                                       | 3029 (84)           |
| No                                                                                                                        | 570 (16)            |
| <i>How do you consider the size of the portions served?</i>                                                               |                     |
| Insufficient                                                                                                              | 204 (5)             |
| Meager                                                                                                                    | 703 (20)            |
| Adequate                                                                                                                  | 2345 (65)           |
| Abundant                                                                                                                  | 321 (9)             |
| Excessive                                                                                                                 | 26 (1)              |
| <i>Express your satisfaction from 1 to 5</i>                                                                              |                     |
| 1                                                                                                                         | 125 (4)             |
| 2                                                                                                                         | 280 (8)             |
| 3                                                                                                                         | 831 (23)            |
| 4                                                                                                                         | 1231 (34)           |
| 5                                                                                                                         | 1132 (31)           |
| <i>Would you like to see this proposal, which includes online mode of choice and nutritional information, replicated?</i> |                     |
| Yes                                                                                                                       | 2998 (83)           |
| No                                                                                                                        | 601 (17)            |

Data are reported as absolute number (percentage).
