# Supplementary material for: Promoting Nutrition and Food Sustainability Knowledge in Apprentice Chefs: An Intervention Study at The School of Italian Culinary Arts—ALMA
Source: MDPI journal article supplement (doi:10.3390/nu16040537), 2024-02-15
Supplement: s1 [file s1]

## Supplementary Material S1

**Table S1** Item analysis for the 23 questions of the food sustainability knowledge questionnaire.

| Item                                                        | Item Difficulty<br>(% Correct Answers) | Item Discrimination<br>( <i>r</i> Value) |
|-------------------------------------------------------------|----------------------------------------|------------------------------------------|
| <i>Construct 1: Basic notions about food sustainability</i> |                                        |                                          |
| 1 – sustainable diet definition                             | 79%                                    | 0.260                                    |
| 2 – animal-based foods                                      | 81%                                    | 0.250                                    |
| 3 – imported goods                                          | 50%                                    | 0.275                                    |
| 4 – red meat                                                | 68%                                    | 0.340                                    |
| 5 – seasonal and low-processed products                     | 95%                                    | 0.309                                    |
| 6 – carbon footprint definition                             | 32%                                    | 0.362                                    |
| 7 – water footprint definition                              | 48%                                    | 0.368                                    |
| 8 – ecological footprint definition                         | 34%                                    | 0.279                                    |
| 9 – Double Pyramid Model concept                            | 32%                                    | 0.418                                    |
| <i>Construct 2: Environmental impact of foods</i>           |                                        |                                          |
| 10 – impact of milk                                         | 43%                                    | 0.010                                    |
| 11 – impact of fish                                         | 28%                                    | 0.157                                    |
| 12 – impact of pork                                         | 80%                                    | 0.314                                    |
| 13 – impact of pasta                                        | 64%                                    | 0.330                                    |
| 14 – impact of hard cheese                                  | 36%                                    | 0.254                                    |
| 15 – high impact foods                                      | 25%                                    | 0.381                                    |
| 16 – low impact foods                                       | 48%                                    | 0.329                                    |
| 17 – transportation and impact of fruit and vegetables      | 60%                                    | 0.266                                    |
| 18 – breeding and impact of meat                            | 72%                                    | 0.323                                    |
| 19 – farming and cooking, and impact of cereals             | 28%                                    | 0.178                                    |
| 20 – impact of local products                               | 22%                                    | 0.186                                    |
| 21 – eco-friendly diet and human health                     | 75%                                    | 0.296                                    |
| 22 – food waste reduction                                   | 39%                                    | 0.314                                    |
| 23 – Mediterranean Diet as a sustainable model              | 86%                                    | 0.284                                    |

Items are reported divided into the two constructs.

**Table S2** Internal consistency.

| Section                                     | Score range | Baseline FSK Score | Cronbach's Alpha |
|---------------------------------------------|-------------|--------------------|------------------|
| Median (IQR)                                |             |                    |                  |
| 1 – Basic notions about food sustainability | 0-9         | 5.0 (4.0-6.0)      | 0.574            |
| 2 – Environmental impact of foods           | 0-14        | 7.0 (6.0-8.0)      | 0.490            |
| Total questionnaire                         | 0-23        | 12.0 (10.0-14.0)   | 0.656            |

FSK: food sustainability knowledge.

**Table S3** Temporal stability (test-retest reliability).

| Section                                        | Baseline SK<br>Score (T0) | Follow-up SK<br>Score (T1) | Correlation<br>(Total Scores) |                  | Correlation<br>(Individual<br>answers) |                      |
|------------------------------------------------|---------------------------|----------------------------|-------------------------------|------------------|----------------------------------------|----------------------|
|                                                | Median (IQR)              | Median (IQR)               | <i>rho</i>                    | <i>p</i> -Value* | <i>rho</i>                             | <i>p</i> -<br>Value* |
| 1 – Basic notions about<br>food sustainability | 5.0 (4.0-6.0)             | 5.0 (4.0-6.0)              | 0.347                         | <0.001           | 0.407                                  | <0.001               |
| 2 – Environmental impact<br>of foods           | 7.0 (6.0-8.0)             | 7.0 (6.0-8.0)              | 0.373                         | <0.001           | 0.434                                  | <0.001               |
| Total questionnaire                            | 12.0 (10.0-14.0)          | 13.0 (10.3-14.0)           | 0.475                         | <0.001           | 0.426                                  | <0.001               |

\*Spearman’s correlation test with significance of  $p < 0.05$

FSK: food sustainability knowledge.

**Table S4** Construct validity.

| Section                                     | FSK score<br>Group 1 | FSK score<br>Group 2 | <i>p</i> -Value* |
|---------------------------------------------|----------------------|----------------------|------------------|
|                                             | Median (IQR)         | Median (IQR)         |                  |
| 1 – Basic notions about food sustainability | 5.0 (4.0-6.0)        | 7.0 (6.0-8.0)        | <0.001           |
| 2 – Environmental impact of foods           | 7.0 (6.0-8.0)        | 9.0 (8.0-10.0)       | <0.001           |
| Total questionnaire                         | 13.0 (10.3-14.0)     | 16.0 (14.0-17.0)     | <0.001           |

\* Test U di Mann-Whitney

FSK: food sustainability knowledge

Group 1: students enrolled in Cooking Techniques and Basic Pastry Techniques courses in which lesson on food sustainability were not provided

Group 2: students enrolled in Advanced Course in Italian Cuisine in which lesson on food sustainability were provided
